1 **Impacts of the COVID-19 pandemic on antibiotic use and resistance in hospitals: a**  
2 **retrospective ecological analysis of French national surveillance data over 2019-2022**

3  
4 Maylis Layan<sup>1,2,3,4</sup>, David R M Smith<sup>5</sup>, Solen Kernéis<sup>6,7</sup>, Loïc Simon<sup>8</sup>, Catherine Dumartin<sup>9,10</sup>, Lory Dugravot<sup>8</sup>,  
5 Amélie Jouzeau<sup>8</sup>, Sylvie Maugat<sup>11</sup>, Laetitia Gambotti<sup>11</sup>, Laurence Watier<sup>2,4</sup>, Lulla Opatowski<sup>2,4‡</sup>, Laura  
6 Temime<sup>1,3‡</sup>

7  
8 <sup>1</sup>PACRI unit, Institut Pasteur, Conservatoire national des arts et métiers, Paris, France

9 <sup>2</sup>Epidemiology and Modelling of Antibiotic Evasion (EMAE), Institut Pasteur, Université de Paris, Paris, France

10 <sup>3</sup>Modélisation, épidémiologie et surveillance des risques sanitaires (MESuRS), Conservatoire national des arts et métiers, Paris,  
11 France

12 <sup>4</sup>CESP, Anti-infective evasion and pharmacoepidemiology team, Université Paris-Saclay, UVSQ, Inserm, Montigny-Le-  
13 Bretonneux, France

14 <sup>5</sup>Health Economics Research Centre, Nuffield Department of Population Health, University of Oxford, Oxford, UK

15 <sup>6</sup>Université Paris Cité, INSERM, IAME, F-75018 Paris, France

16 <sup>7</sup>Equipe de Prévention du Risque Infectieux (EPRI), AP-HP, Hôpital Bichat, Paris, France

17 <sup>8</sup>CPIAS Grand-Est, CHRU Nancy, France

18 <sup>9</sup>CPIAS Nouvelle-Aquitaine, CHU de Bordeaux, Bordeaux, France

19 <sup>10</sup>Univ. Bordeaux, INSERM, BPH, U1219, Team AHead, Bordeaux, France

20 <sup>11</sup>French National Public Health Agency, Department of Infectious Diseases, Saint-Maurice, France

21 <sup>‡</sup>Contributed equally

22  
23 **Corresponding author:**

24 Maylis Layan ([m.layan@hotmail.fr](mailto:m.layan@hotmail.fr))

25  
26 **Keywords:** antibiotic resistance ; antibiotic use ; hospital ; COVID-19 ; temporal dynamics ; multivariate  
27 count regression

28  
29  
30  
31  
32  
33  
34  
35  
36  
37  
38  
39  
40  
41  
42  
43  
44  
45  
46

47 **Summary**

48 **Background**

49 The COVID-19 pandemic led to major disruptions in healthcare services at the hospital and community  
50 levels. The resulting impact on antibiotic resistance (ABR) in hospitals is difficult to predict.

51

52 **Methods**

53 We exploited data from the French national surveillance system over four years (2019-2022) including  
54 414 hospitals across 12 French regions. We evaluated changes in annual antibiotic use compared to 2019  
55 using multiple comparison tests. We also compiled a large dataset of 692,551 incident isolates for five  
56 antibiotic-bacterium pairs. Using negative binomial regression models accounting for autocorrelation and  
57 antibiotic use, we evaluated associations between resistant isolates incidence and COVID-19 indicators  
58 (pandemic periods or intubated COVID-19 patient prevalence). We investigated how these associations  
59 varied specifically in ICUs ( $n=85$ ) and across geographical regions.

60

61 **Findings**

62 The use of some antibiotics, including azithromycin, imipenem and meropenem, significantly increased  
63 between 2020 and 2022. Concomitantly, the incidence of methicillin-resistant *Staphylococcus aureus* (up  
64 to 37%, 95% CI: 18-53%) and ESBL-producing *Escherichia coli* (up to 33%, 95% CI: 16-46%) isolates  
65 significantly decreased in hospitals and ICUs during the pandemic. A transient decrease in ICUs was also  
66 observed for ESBL-producing *Klebsiella pneumoniae* during periods of strong anti-COVID-19 interventions  
67 in the community (24%, 95% CI: 6-38%). No significant changes for ESBL-producing *Enterobacter cloacae*  
68 complex were observed. Very interestingly, the incidence of carbapenem-resistant *Pseudomonas*  
69 *aeruginosa* isolates was associated with COVID-19 intubation prevalence in hospitals ( $p<0.001$ ) and ICUs  
70 ( $p<0.001$ ), notably in the regions most affected by the pandemic.

71

72 **Interpretation**

73 Our results highlight strong modifications of antibiotic use and pathogen-specific global impacts of the  
74 COVID-19 pandemic on ABR in hospitals. Even though the biological mechanisms underlying between-  
75 species differences remain unclear, these results provide important insights into the potential impacts of  
76 a viral pandemic on ABR and support the need for pandemic preparedness in healthcare facilities.

77

78 **Funding**

79 ANR-10-LABX-62-IBEID.

80

81

82

83

84

85

86

87

88

89

90

91

## 92 **Research in context**

### 93 **Evidence before this study**

94 We searched PubMed for articles in English published between Jan 1, 2020, and August 31, 2024 exploring  
95 national-scale changes in antibiotic resistance (ABR) within healthcare settings during the COVID-19  
96 pandemic. Search terms for titles and abstracts were (“antibiotic resistance” OR “antimicrobial resistance”  
97 OR “bacterial resistance” OR “drug resistance” OR “MRSA” OR “ESBL” OR “carbapenem resistant”) AND  
98 (“hospital” OR “healthcare”) AND (“COVID-19” OR “SARS-CoV-2”) AND (“national” OR “nationwide”). The  
99 search yielded 94 results. We identified 12 relevant studies after filtering out articles referring to viruses,  
100 parasites, or fungi, focusing on a single hospital, evaluating changes in antibiotic use only, assessing  
101 healthcare workers’ practices, or using qualitative approaches. All studies used either national  
102 surveillance data on antibiotic resistance or large multi-center cohorts of inpatients. Five studies showed  
103 a significant increase in MRSA, at least during the first wave of the COVID-19 pandemic, while two studies  
104 did not find changes at the national level compared to 2019. Interestingly, one study showed that the  
105 abandonment of infection prevention and control strategies that specifically target hospital-acquired  
106 MRSA infections was associated with an increase of these infections, regardless of COVID-19 admission  
107 prevalence. One study in Spain showed decreased resistance of *P. aeruginosa* to all tested antibiotics in  
108 2022 compared to 2017, using point prevalence survey results. Conversely, one study focusing on US  
109 Veterans Affairs hospitals showed increased incidence and resistance of healthcare-associated  
110 carbapenem-resistant *P. aeruginosa* (CR-PA) infections during the pandemic. Most studies used univariate  
111 statistical approaches. Only two studies included COVID-19-related variables in their models; they found  
112 no association with MRSA or extended-spectrum cephalosporin-resistant *E. coli* and *K. pneumoniae*.

113

### 114 **Added value of this study**

115 Here, we provide the first evaluation of the impact of the pandemic on antibiotic consumption and  
116 resistance for five antibiotic-bacterium pairs (MRSA, CR-PA, ESBL-producing *E. coli*, ESBL-producing *K.*  
117 *pneumoniae*, and ESBL-producing *E. cloacae* complex) in hospitals, at the national and regional scales. By  
118 analyzing French surveillance data from the SPARES database including 414 hospitals that represent up to  
119 14% of French hospitals, we evaluated annual changes in antibiotic use and quantified the impacts at the  
120 weekly level of the COVID-19 pandemic on the incidence of five of the most prevalent resistant bacteria  
121 in France. Accounting for autocorrelation and antibiotic use, factors that were not considered in previous  
122 studies, we report a significant positive association between the weekly incidence of CR-PA isolates and  
123 the prevalence of intubated COVID-19 patients in the preceding weeks. Carbapenem use and intubation  
124 being risk factors of CR-PA infections, our results suggest a direct impact of the pandemic on CR-PA  
125 epidemiology. Inversely, we show that the incidence of ESBL-producing *E. coli* and MRSA isolates  
126 decreased after the start of the first pandemic wave at the hospital level but also in ICUs. The fine grain  
127 analysis across 12 French administrative regions revealed regional heterogeneities, but highlighted  
128 consistent associations in the regions most affected by the COVID-19 pandemic.

129

### 130 **Implications of all the available evidence**

131 Pandemics not only destabilize healthcare systems by adding pressure and changing healthcare worker  
132 behaviors, but also influence the epidemiology of other infectious diseases as shown in our study. We  
133 specifically highlight the contrasting effects of the COVID-19 pandemic on ABR in French hospitals,  
134 associated with an increase in CR-PA isolate incidence but a general decrease in ESBL-producing *E. coli*  
135 and MRSA. This work highlights how national-scale hospital surveillance systems such as SPARES that  
136 collect data at the weekly level are key to capture the evolving impacts of pandemics. They also allow to  
137 generate hypotheses on the potential mechanisms of action of the pandemic on ABR epidemiology, as  
138 showcased by the analysis of CR-PA isolates incidence, and thereby participate in the improvement of  
139 healthcare systems in pandemic context.

140  
141  
142  
143  
144  
145  
146  
147  
148  
149  
150  
151  
152  
153  
154  
155  
156  
157  
158  
159  
160  
161  
162  
163  
164  
165  
166  
167  
168  
169  
170  
171  
172  
173  
174  
175  
176  
177  
178  
179  
180  
181  
182  
183  
184  
185

## Introduction

Antibiotic resistance (ABR) is a leading health problem worldwide associated with an estimated 1·14 (1·00-1·28) million deaths in 2021.<sup>1</sup> Exceptional health events, such as pandemics, lead to major changes in care and hygiene practices in both the community and hospitals, which may modify ABR epidemiology. For instance, during the COVID-19 pandemic, social distancing measures<sup>2</sup> and reduced outpatient antibiotic prescription<sup>3,4</sup> might have reduced ABR burden in hospitals. Healthcare workers (HCWs) also reported greater hand hygiene compliance and availability of alcohol-based hand rub.<sup>5,6</sup> On the other hand, inpatient antibiotic use increased in France,<sup>7</sup> probably related to the high proportion of COVID-19 patients receiving antibiotics as reported in several meta-analyses.<sup>8,9</sup> In parallel, surges in COVID-19 patients in hospitals often exceeded bed capacity with a sicker patient-case mix.<sup>5</sup> This generated higher workload and decreased the time that HCWs could allocate to antibiotic stewardship and infection prevention and control (IPC).<sup>5</sup> A striking example is the increase of MRSA incidence in US Veterans Affairs hospitals with interrupted IPC during the pandemic.<sup>10</sup> The combined impact of all these effects, at the community and hospital levels, is difficult to predict<sup>11</sup> and may have changed throughout the pandemic, which was notably marked by the improvement of COVID-19 patient management and treatment (e.g. reduction in antibiotic prescribing<sup>12,13</sup> and mechanical ventilation<sup>14</sup>).

Several studies have attempted to quantify the impacts of the pandemic on ABR in hospitals, but the evidence remains conflicting.<sup>10,15,16</sup> A meta-analysis estimated that MRSA incidence did not change during the pandemic, whereas there was a statistically insignificant trend for increased incidence of extended-spectrum  $\beta$ -lactamase (ESBL)-producing Enterobacterales and CR-PA.<sup>15</sup> Heterogeneity in terms of settings, study design, and health outcomes, as well as heterogeneity in baseline epidemiological situations and local practices, might have undermined the statistical power of this meta-regression. A recent comprehensive study on antibiotic-resistant healthcare-associated infections in US Veterans Affairs hospitals also highlighted varying trends across antibiotic-bacterium combinations during the pandemic.<sup>16</sup>

Here, we aimed to assess the impacts of the pandemic on antibiotic use and antibiotic-resistant bacteria in French hospitals using large-scale surveillance data over 2019-2022. We evaluated changes in antibiotic use in hospitals compared to 2019 as a potential key mechanism of pandemic action on ABR epidemiology in hospitals. For five antibiotic-resistant bacteria of major importance in French hospitals (ESBL-producing *E. coli* - ESBL-EC, ESBL-producing *K. pneumoniae* - ESBL-KP, ESBL-producing *E. cloacae* complex - ESBL-ECC, MRSA, and CR-PA), we quantified the association between their incidence and the burden of severe COVID-19 patients, we investigated whether these associations were similar in the specific context of intensive care units (ICUs), and we evaluated how associations with the pandemic varied across geographical regions.

## Methods

### Data sources

*Antibiotic resistance and antibiotic consumption in hospitals*

186 We obtained ABR and antibiotic use data from the French National Surveillance Database on Antibiotic  
187 Resistance in hospitals (SPARES). SPARES compiles data reported by participating hospitals on (i)  
188 microbiological test results from clinical samples and (ii) annual antibiotic consumption by anatomical  
189 therapeutic chemicals (ATC) class (Figure 1A).<sup>7</sup> Consolidated data are only available from 2019 on. SPARES  
190 provided us with microbiological test results and antibiotic use data from the 1<sup>st</sup> of January 2019 to the  
191 31<sup>st</sup> of December 2022.

192  
193 Clinical tests reported in SPARES encompass infection and colonization events. No information about the  
194 source of acquisition (community or healthcare) is available. Clinical test results are interpreted according  
195 to the EUCAST guidelines by participating hospitals.

196  
197 Hospitals report their annual antibiotic consumption by ATC class in number of defined daily doses (DDD)  
198 for 1,000 bed-days.

199  
200 *Hospital stays*

201  
202 We obtained data on occupied bed-days from the National Hospital Discharge Database (PMSI), a  
203 database dedicated to hospital activity evaluation for budget allocation. As such, it documents for all  
204 hospital stays their type, duration, associated diagnoses and medical procedures. We exploited this  
205 database to extract the weekly number of occupied bed-days in acute care facilities between the 1<sup>st</sup> of  
206 January 2019 and the 31<sup>st</sup> of December 2022. We also extracted the weekly number of intubated COVID-  
207 19 patients' bed-days (appendix pp 6-7).

208  
209 **Data selection procedure**

210  
211 We explored ESBL-EC, ESBL-ECC, ESBL-KP, MRSA, and CR-PA dynamics since they are on the WHO priority  
212 list<sup>17</sup> and amongst the resistant bacteria with highest incidence in France.<sup>18</sup> Of all available isolates in  
213 SPARES ( $n=2,370,650$ ), we selected the ones corresponding to the studied bacterial species that are tested  
214 for the resistance of interest. Importantly, when multiple samples potentially corresponded to the same  
215 acquisition episode and were performed within a 30-day period, we kept only the first sample as we were  
216 interested in incident episodes (Figure 1B). Our selection procedure led to the inclusion of 692,551  
217 episodes, 74,387 of which were resistant. Concerning antibiotics, only ATC-J01 antibiotics reported over  
218 the four years of the study period were included (appendix pp 2-3).

219  
220 Hospitals report their data to SPARES on a voluntary basis leading to non-exhaustive and possibly non  
221 representative data collection. To ensure our analysis is based on a temporally stable database, we  
222 restricted our analyses to hospitals that systematically reported their antibiotic consumption and clinical  
223 tests results over the four years of the study period. Other exclusion criteria are listed in Figure 1C.  
224 Selected hospitals ( $n=414$ ) are distributed over the 12 administrative regions of hexagonal France (Figure  
225 1D). We assessed the representativeness of our cohort in appendix pp 3-6.

226  
227 **Outcomes**

228  
229 We investigated the dynamics of the following outcomes at the national and/or regional levels and at the  
230 hospital and/or ICU levels over the study period:

- 231 - Annual proportion of resistant episodes for each antibiotic-bacterium pair: annual number of  
232 resistant episodes divided by annual number of total episodes.

- 233 - Weekly incidence of resistant bacterial isolates: weekly number of incident resistant episodes  
234 divided by weekly number of occupied bed-days (from the PMSI) times 1,000.  
235 - Annual consumption of antibiotics in DDD for 1,000 bed-days.

236  
237 The hospital level included rehabilitation care, general medicine, surgery, gynecology-obstetrics, and ICU.

## 238 239 **Statistical analyses**

### 240 241 *Antibiotic consumption dynamics*

242  
243 For each antibiotic class, we evaluated whether its consumption had changed over the study period by  
244 comparing annual consumption distributions using Friedman tests (non-parametric alternative of the one-  
245 way ANOVA for repeated measures). We then explored the evolution of antibiotic consumption using  
246 2019 as a reference year by performing three pairwise Wilcoxon signed-rank tests. We applied a  
247 Bonferroni correction for multiple testing, and reported adjusted p-values and 98.3% confidence intervals  
248 (CIs) to account for the correction.

### 249 250 *Antibiotic-resistant episodes dynamics*

251  
252 For each antibiotic-bacterium pair, we evaluated whether there was a linear trend in the annual  
253 proportion of resistance in hospitals at the national level using the  $\chi^2$  test for trend in proportions. When  
254 resistance proportions exhibited a significant increase or decrease between 2019 and 2022, we estimated  
255 the slope of the linear trend using linear regression minimizing weighted least squares.

256  
257 Then, for each bacterium pair, we investigated ABR and COVID-19 association using multivariate count  
258 regression models. We modeled the incident number of resistant isolates of a bacterial species  $N_w$  during  
259 week  $w$  in hospitals or ICUs as a negative binomial distribution to account for overdispersion. The  
260 equations of the models are as follows:

$$261 \quad N_w \sim NB(\lambda_w, \phi)$$

$$262 \quad \log(\lambda_w) = \beta_0 + \log\left(\frac{n_w}{1000}\right) + \beta_1 \cdot \frac{N_{w-1}}{n_{w-1}} \cdot 1000 + \beta_2 \cdot \text{Antibiotic}_y$$

263  
264  
265  
266 With  $\phi$  the overdispersion parameter,  $\beta_0$  the intercept,  $n_w$  the number of occupied bed-days at week  $w$ ,  
 $\frac{n_w}{1000}$  the occupied bed-days permillage at week  $w$  (offset),  $\frac{N_{w-1}}{n_{w-1}} \cdot 1000$  the incidence of resistant  
267 bacterial isolates per 1,000 bed-days in the preceding week ( $w - 1$ ) to account for autocorrelation, and  
268  $\text{Antibiotic}_y$  the consumption level (in DDD for 1,000 bed-days) of the main antibiotic class targeted by  
269 the resistance during year  $y$  that includes week  $w$ . Target antibiotic classes correspond to  
270 imipenem+meropenem for *P. aeruginosa*, 3GC for Enterobacterales, and penicillins for *S. aureus*. We  
271 considered antibiotic consumption as a confusion factor, and investigated its impact in a sensitivity  
272 analysis (appendix pp 22-25). We compared this baseline model to 6 distinct models accounting for  
273 COVID-19-related variables (appendix p10-11). These variables were either the period of the pandemic (a  
274 categorical variable indicating the pre-pandemic period, the first wave and periods marked by three levels  
275 of anti-COVID-19 restrictions in the community), or COVID-19 intubation prevalence. The levels of anti-  
276 COVID-19 restrictions in the community were based on Paireau and colleagues,<sup>2</sup> but we considered the  
277

278 first wave separately as it was marked by a very specific context of care disorganization in hospitals. The  
279 prevalence of intubated COVID-19 patients (weekly number of intubated COVID-19 patients' bed-days  
280 divided by the weekly number of bed-days times 1,000) represented the burden of severe COVID-19  
281 patients. For both COVID-19-related variables, we tested variables at week  $w$ ,  $w - 1$ , and  $w - 2$ .  
282 Continuous explanatory variables (prevalence of COVID-19 intubation, antibiotic consumption, resistant  
283 isolate incidence at week  $w - 1$ ) were on very different scales, so we standardized them to facilitate the  
284 comparison of regression coefficients across explanatory variables, models and bacterial species.

285  
286 We calculated the 95% CIs for the regression coefficients using a normal approximation to the distribution  
287 of the maximum likelihood estimators. For each antibiotic-bacterium pair, we selected the model with the  
288 lowest Akaike Information Criterion (AIC). Models were fitted by maximum likelihood using the `glm.nb`  
289 function of the R package MASS ([appendix pp 10-19](#)).<sup>19</sup>

290  
291 When the best model included COVID-19-related variables, we further explored how associations varied  
292 across the 12 administrative regions by fitting the model selected in the national analysis to regional  
293 hospital data separately for each region and accounting for overdispersion when necessary. We did not  
294 investigate regional ICU data alone due to the limited number of episodes and absence of ICUs in some  
295 regions ([Figure 1D](#)).

296  
297 All statistical analyses were done with R, version 4.3.0. This study adheres to the Strengthening the  
298 Reporting of Observational studies in Epidemiology (STROBE) reporting guideline.

### 299 300 **Role of the funding source**

301  
302 The funders had no role in study design, data analysis, data interpretation, or writing of the paper.

## 303 304 305 **Results**

### 306 307 **Evolution of antibiotic use in hospitals during the pandemic in France**

308  
309 Annual antibiotic consumption strongly varied across hospitals ( $n=414$ , gray lines) of our cohort and across  
310 antibiotic classes, penicillins and quinolones being the most used ([appendix p20](#) and [Table 1](#)). Overall, a  
311 median increase in total consumption of 7.5 DDD per 1,000 bed-days (98.3% CI: 2.7, 12.5) was found in  
312 2020 compared to 2019 but it did not persist. For all antibiotic classes explored, significant changes in  
313 annual consumption were found, with strong variations across classes ([Table 1](#)). Carbapenem  
314 consumption, and more specifically imipenem and meropenem, showed a significant increase in 2020 and  
315 2021, while cephalosporins increased until 2022. Interestingly, macrolide consumption significantly  
316 increased only in 2020 (+1.71 DDD/1,000 bed-days, 98.3% CI: +0.9 to +2.6), while azithromycin  
317 consumption significantly increased during the whole pandemic period.

318  
319 Antibiotic use dynamics varied across regions ([Figure 2A](#) and [appendix p 21](#)). A significant increase of total  
320 antibiotic use was observed in 2020 in Île-de-France (IDF), Grand-Est (GES) and Auvergne-Rhône-Alpes  
321 (ARA). Interestingly, macrolide consumption significantly increased in four regions in 2020, especially  
322 azithromycin whose consumption increased in seven regions ([Figure 2B](#)). Importantly, the increase of  
323 azithromycin use persisted until 2022 in Hauts-de-France (HDF), Occitanie (OCC), and Provence-Alpes-  
324 Côte d'Azur (PAC).

325  
326 In ICUs ( $n=85$ ), we observed higher antibiotic consumption levels ([appendix p20](#)) and changes of larger  
327 magnitude compared to the overall hospital level ([Table 2](#)). Although we did not find a significant change  
328 in total antibiotic consumption in these wards, we observed a significantly increased use of carbapenems,  
329 cephalosporins, and macrolides in 2020. Imipenem and meropenem consumption remained significantly  
330 higher until 2022 (+12.42 DDD/1,000 bed-days, 98.3% CI: +1.9 to +22.4), while carbapenem use decreased  
331 to its 2019 level in 2022. Macrolide (+17.41 DDD/1,000 bed-days, 98.3% CI: +7.7 to +28.9) and  
332 azithromycin (+12.69 DDD/1,000 bed-days, 98.3% CI: +5.8 to +20.5) consumption significantly increased  
333 but only during the first year of the pandemic, contrary to the hospital level. Finally, penicillin consumption  
334 significantly decreased in 2020 and 2021 compared to 2019.

### 335 336 **Contrasting impacts of the pandemic on ABR in French hospitals**

337  
338 Among the 692,551 included isolates, *E. coli* was the most represented bacteria in our dataset with  
339 376,685 isolates ([Figure 3A](#)). The evolution of annual resistance rates over 2019-2022 varied across  
340 antibiotic-bacterium pairs. We found a significantly decreasing trend for MRSA ( $p<0.001$ ), ESBL-EC  
341 ( $p<0.001$ ), ESBL-KP ( $p<0.001$ ), and ESBL-ECC ( $p=0.031$ ), but a significantly increasing trend for CR-PA  
342 ( $p<0.001$ , [Figures 3B-C](#)). No clear variation of resistance proportion at the weekly level was observed  
343 ([appendix p 8](#)).

344  
345 In contrast, the analysis of weekly incidence of resistant isolates revealed interesting dynamics ([Figure](#)  
346 [3D](#)). Comparing regression models that included or not COVID-19-related variables at the country level  
347 led to the selection of distinct models depending on the antibiotic-bacterium pair. For ESBL-EC and MRSA,  
348 the selected model included the pandemic periods. For CR-PA, the prevalence of intubated COVID-19  
349 patients two weeks prior was selected. Incidence significantly decreased for ESBL-EC (up to 15% decrease,  
350 95% CI: 11-19%) and MRSA (up to 26% decrease, 95% CI: 22-30%) after the first pandemic wave, while the  
351 prevalence of intubated COVID-19 patients was significantly associated with higher incidence of CR-PA  
352 isolates ( $p<0.001$ , [Figure 4A](#)).

353  
354 Focusing on ICUs, we observed similar patterns with slight differences ([Figure 4A](#)). Notably, MRSA isolates  
355 incidence significantly decreased from the first pandemic wave onwards (up to 37% decrease, 95% CI: 18-  
356 53%) and the best model for ESBL-KP included the pandemic periods with a significant decrease in  
357 incidence during the periods of strong anti-COVID-19 interventions (24% decrease, 95% CI: 6-38%).

358  
359 At the regional level, we estimated that COVID-19 intubation prevalence was significantly associated with  
360 an increased incidence of CR-PA isolates in IDF ( $p=0.005$ ), GES ( $p=0.006$ ), ARA ( $p=0.008$ ), and PAC  
361 ( $p=0.004$ , [Figure 4C](#)). Interestingly, these regions were amongst the most affected by the pandemic ([Figure](#)  
362 [4E](#)). These results strengthen the evidence that the pandemic may have led to an increase in CR-PA isolate  
363 incidence. For ESBL-EC and MRSA, associations between incidence and pandemic periods are highly  
364 heterogeneous across administrative regions with evidence of a significant decrease in incidence after the  
365 first pandemic wave in multiple regions ([Figure 4D](#)).

## 366 367 368 **Discussion**

369  
370 Using national surveillance data in French hospitals between 2019 and 2022, we showed changes in  
371 antibiotic use over the course of the pandemic, highlighting increasing use of azithromycin, imipenem,



372 and meropenem. We also found that the pandemic had contrasting impacts on ABR, that varied across  
373 antibiotic-bacterium pairs and administrative regions, which could be due to differences in the modes of  
374 transmission, spatiotemporal dynamics, and drivers of the five studied antibiotic-bacterium pairs. These  
375 differences across pairs stress that ABR should not be regarded as a one-solution problem.

376  
377 We estimated overall reductions in use of penicillins in hospitals over the study period, as observed in  
378 2020 in the community in France,<sup>4</sup> probably due to the reduction of common infections generally treated  
379 with penicillins. They were probably replaced by cephalosporins and carbapenems for which we showed  
380 an increased use. We also showed an increased use of macrolides, among which azithromycin, as  
381 observed in the community.<sup>3,4</sup> These changes are certainly due to the management of COVID-19 patients,  
382 at least at the start of the pandemic, when COVID-19 patients represented most of the hospitalizations.  
383 Indeed, cephalosporins, carbapenems, and azithromycin were the antibiotics most commonly prescribed  
384 to COVID-19 patients.<sup>8,12,13</sup> Importantly, we showed that azithromycin use in hospitals and imipenem and  
385 meropenem use in ICUs remained high until 2022. These increases are concomitant with higher  
386 carbapenem resistance in *P. aeruginosa* as shown here, and could have led to the increase of azithromycin  
387 resistance,<sup>20</sup> or even other resistances.<sup>20</sup> Unfortunately, we could not evaluate azithromycin resistance  
388 given the very limited number of bacterial isolates tested for this antibiotic. All these dynamics may have  
389 changed selective pressures in hospitals and require careful attention. It is important to stress that we did  
390 not assess antibiotic use dynamics in the community, which can also impact the selective pressure in  
391 hospitals.

392  
393 To the best of our knowledge, this is the first study evaluating the association between ABR and COVID-  
394 19-related variables in hospitals using weekly level national surveillance data that also include antibiotic  
395 use or autocorrelation terms.<sup>10,21</sup> The results from our regression analysis suggest that CR-PA isolate  
396 incidence increased with COVID-19 intubation prevalence, an association that we also quantified at the  
397 regional level and that is certainly driven by ICUs ([appendix p 26](#)). We further confirmed this association  
398 in a sensitivity analysis where likelihood ratio tests always selected the model with COVID-19 intubation  
399 at  $w - 2$  rather than COVID-19 intubation in the following weeks ( $w + 1$ ,  $w + 2$ , and  $w + 3$ , [appendix](#)  
400 [pp 26-27](#)). These results are in agreement with previous studies.<sup>15,16,22</sup> A possible mechanism explaining  
401 this association pertains to the increase of known risk factors of CR-PA infections, notably more frequent  
402 intubation,<sup>23</sup> longer hospitalizations, and higher antibiotic use in COVID-19 patients.<sup>23,24</sup> Interestingly,  
403 when we did not account for imipenem and meropenem use in the hospital regression model, the AICs of  
404 the models including the pandemic periods at week  $w - 1$  or the prevalence of intubated COVID-19  
405 patients at week  $w - 2$  were equivalent. Still, we estimated an increased incidence compared to the pre-  
406 pandemic period in the model with the pandemic periods at week  $w - 1$  ([appendix pp 22-25](#)).

407  
408 In contrast, our analysis shows that MRSA and ESBL-EC isolates incidence significantly decreased during  
409 the pandemic. Previous reports have highlighted a steady decrease of MRSA incidence since 2003 in  
410 France,<sup>25</sup> as well as a recent decrease of ESBL-EC between 2016 and 2018.<sup>26</sup> Thus, it is difficult to assess  
411 whether the decrease that we observe is due to long-term trends only or whether the pandemic has  
412 accelerated the decrease, for instance through higher adherence to hand hygiene,<sup>5</sup> a known factor of  
413 MRSA prevention.<sup>27</sup> Concerning ESBL-EC, we estimated a decrease in incidence after the first wave, but  
414 our regression model does not explain incidence dynamics well during the first wave ([appendix p 19](#)).  
415 According to a study in French ICUs during the first wave, COVID-19 patients were more frequently co-  
416 infected with ESBL-EC than non-COVID-19 patients<sup>28</sup> and a meta-analysis highlighted a higher incidence  
417 of ESBL-EC during the first year of the pandemic.<sup>15</sup> It is therefore possible that the impacts of the pandemic  
418 on ESBL-EC changed first with conditions that favored ESBL-EC infections, later followed by conditions that  
419 prevented these infections. Again, our model did not account for the community and we also cannot rule

420 out the contribution of the evolution of ABR in the community on these dynamics. However, there is  
421 scarce evidence of changes in ESBL-EC<sup>29</sup> and MRSA in the French community.

422  
423 In parallel, our regression analysis suggests that there is transient association between COVID-19 and  
424 ESBL-KP and no association between COVID-19 and ESBL-ECC. In our sensitivity analysis, we estimated  
425 stronger changes in ESBL-KP isolate incidence at the start of the pandemic, but they did not persist and  
426 concerned only ICUs ([appendix pp 18-19](#)). This is consistent with the literature that showed an  
427 insignificant increase in the incidence of ESBL-producing Enterobacterales.<sup>15,16</sup>

428  
429 Several limitations of our study should be mentioned. As in any ecological study, we quantified changes  
430 using data aggregated at the national or regional level, which hides hospital heterogeneity in terms of  
431 size, hospital type, local practices, or degree to which they were affected by the COVID-19 pandemic. This  
432 also prevents generalization to every French hospital. Secondly, the analyses were carried out on a  
433 subsample of French hospitals, representing about 14% of all French hospitals (3,008 in 2019). While this  
434 cohort is relatively representative in terms of healthcare-associated infections prevalence across regions,  
435 it is not representative of the regional distribution of hospital activity or hospital number in France.  
436 Besides, hospitals report their data on a voluntary basis. Consequently, we cannot rule out that there is a  
437 selection bias in our cohort. For instance, the observed regional differences in antibiotic consumption and  
438 CR-PA incidence may be due to missing university hospitals in some regions. Thirdly, the source of  
439 acquisition, i.e. whether bacteria were acquired in the community or in the hospital, was not available.  
440 Analyzed data thereby result from dynamics of both settings. Fourth, we did not stratify incidence by  
441 specimen type (e.g. bloodstream, genital tract, respiratory tract, skin, body fluids, feces, and urine). We  
442 might expect different temporal patterns over the year, notably for lower respiratory tract specimens.  
443 Fifth, hospitals only report their antibiotic consumption annually, preventing us from exploring weekly  
444 level associations with ABR incidence. Indeed, antibiotic use may display seasonal patterns as observed in  
445 the community.<sup>30</sup> Finally, the national surveillance system of ABR changed in 2018, making it impossible  
446 to have weekly time series of ABR prior to 2019. Due to this short history, we could not include seasonality  
447 in the regression model or account for long-term trends, as previously discussed.

448  
449 In conclusion, hospital antibiotic use and ABR epidemiology strongly varied during the COVID-19 pandemic  
450 in France. The biological mechanisms underpinning the changes in ABR epidemiology likely vary across  
451 the investigated antibiotic-bacterium pairs and remain to be elucidated. Continued surveillance efforts in  
452 hospitals is pivotal and will help build healthcare facilities that are more resilient in pandemic contexts.

453  
454

## 455 **Contributions**

456  
457 ML, LT, LO, and LW designed the statistical analyses. ML, LT, LO, and SK interpreted the results. ML and  
458 DRMS analyzed the data. LS, CD, LD, AJ, SM and LG provided support on data interpretation and analysis.  
459 ML, LT, and LO wrote the manuscript. All authors had access to the processed data and reviewed the  
460 manuscript. All authors take responsibility for the decision to submit for publication.

## 461 **Acknowledgments**

462  
463  
464 ML received funding from the National Clinical Research Program and the Investissement d’Avenir  
465 program, Laboratoire d’Excellence “Integrative Biology of Emerging Infectious Diseases” (ANR-10-LABX-  
466 62- IBEID). ML thanks the Fondation des Treilles for their support. The authors would like to thank

467 Christian Brun-Buisson for his helpful comments on bacterial sample selection, and Fanny Chéreau for the  
468 very insightful discussions on national surveillance systems collecting hospitalizations of COVID-19  
469 patients.

470

## 471 **Declaration of interests**

472

473 LW reports personal fees from Pfizer, Sanofi and Heva outside the submitted work. LO reports research  
474 grants from Pfizer and Sanofi Pasteur through her institution outside the submitted work. The authors  
475 report no other potential conflicts of interest.

476

## 477 **Data sharing statement**

478

479 PMSI and SPARES data are not publicly available. R codes to describe antibiotic consumption and quantify  
480 the association between COVID-19-related variables and national or regional resistance data for the  
481 antibiotic-bacterium pairs of interest are available online  
482 ([https://github.com/mlayan/abr\\_covid\\_in\\_french\\_hospitals](https://github.com/mlayan/abr_covid_in_french_hospitals)).

483

## 484 **Ethics approval**

485

486 Because the analysis was performed using anonymized surveillance data, ethical consent was not required  
487 according to the French Data Protection Act. The database was accredited by the French National Data  
488 Protection Commission (CNIL no. 2211022 v 0), and the fully anonymized data waiver for informed  
489 consent of patients was applied.

490

## 491 **References**

492

493 1 Naghavi M, Vollset SE, Ikuta KS, *et al.* Global burden of bacterial antimicrobial resistance 1990–2021: a  
494 systematic analysis with forecasts to 2050. *The Lancet* 2024; **0**. DOI:10.1016/S0140-6736(24)01867-1.

495 2 Paireau J, Charpignon M-L, Larrieu S, *et al.* Impact of non-pharmaceutical interventions, weather,  
496 vaccination, and variants on COVID-19 transmission across departments in France. *BMC Infect Dis* 2023;  
497 **23**: 190.

498 3 Bara W, Brun-Buisson C, Coignard B, Watier L. Outpatient Antibiotic Prescriptions in France: Patients  
499 and Providers Characteristics and Impact of the COVID-19 Pandemic. *Antibiotics* 2022; **11**: 643.

500 4 Weill A, Drouin J, Desplas D, Cuenot F, Dray-Spira R, Zureik M. Usage des médicaments de ville en  
501 France durant l'épidémie de la Covid-19 – point de situation jusqu'au 25 avril 2021. Étude pharmaco-  
502 épidémiologique à partir des données de remboursement du SNDS. EPI-PHARE (Groupement d'intérêt  
503 scientifique ANSM-Cnam), 2021 [https://www.epi-phare.fr/rapports-detudes-et-publications/covid-](https://www.epi-phare.fr/rapports-detudes-et-publications/covid-19-usage-des-medicaments-rapport-6)  
504 [19-usage-des-medicaments-rapport-6](https://www.epi-phare.fr/rapports-detudes-et-publications/covid-19-usage-des-medicaments-rapport-6).

505 5 Tomczyk S, Taylor A, Brown A, *et al.* Impact of the COVID-19 pandemic on the surveillance, prevention  
506 and control of antimicrobial resistance: a global survey. *J Antimicrob Chemother* 2021; **76**: 3045–58.

507 6 Cole J, Barnard E. The impact of the COVID-19 pandemic on healthcare acquired infections with  
508 multidrug resistant organisms. *Am J Infect Control* 2021; **49**: 653–4.

509 7 Dumartin C, Chabaud A, Couvé-Deacon E, *et al.* Consommation d'antibiotiques et résistances  
510 bactériennes en établissement de santé. Données Spares 2019-2022. *Bull Epidémiologique Hebd* 2023;  
511 : 465–72.

512 8 Langford BJ, So M, Raybardhan S, *et al.* Antibiotic prescribing in patients with COVID-19: rapid review

- 513 and meta-analysis. *Clin Microbiol Infect* 2021; **27**: 520–31.
- 514 9 Lansbury L, Lim B, Baskaran V, Lim WS. Co-infections in people with COVID-19: a systematic review and  
515 meta-analysis. *J Infect* 2020; **81**: 266–75.
- 516 10 Evans ME, Simbartl LA, McCauley BP, *et al.* Active Surveillance and Contact Precautions for Preventing  
517 Methicillin-Resistant Staphylococcus aureus Healthcare-Associated Infections During the COVID-19  
518 Pandemic. *Clin Infect Dis* 2023; **77**: 1381–6.
- 519 11 Smith DRM, Shirreff G, Temime L, Opatowski L. Collateral impacts of pandemic COVID-19 drive the  
520 nosocomial spread of antibiotic resistance: A modelling study. *PLOS Med* 2023; **20**: e1004240.
- 521 12 Cong W, Poudel AN, Alhusein N, Wang H, Yao G, Lambert H. Antimicrobial Use in COVID-19 Patients in  
522 the First Phase of the SARS-CoV-2 Pandemic: A Scoping Review. *Antibiotics* 2021; **10**: 745.
- 523 13 Cong W, Stuart B, Alhusein N, *et al.* Antibiotic Use and Bacterial Infection in COVID-19 Patients in the  
524 Second Phase of the SARS-CoV-2 Pandemic: A Scoping Review. *Antibiotics* 2022; **11**: 991.
- 525 14 Hermann B, Benghanem S, Jouan Y, Lafarge A, Beurton A, the ICU French FOXES (Federation Of  
526 eXtremely Enthusiastic Scientists) Study Group. The positive impact of COVID-19 on critical care: from  
527 unprecedented challenges to transformative changes, from the perspective of young intensivists. *Ann*  
528 *Intensive Care* 2023; **13**: 28.
- 529 15 Langford BJ, Soucy J-PR, Leung V, *et al.* Antibiotic resistance associated with the COVID-19 pandemic:  
530 a systematic review and meta-analysis. *Clin Microbiol Infect* 2023; **29**: 302–9.
- 531 16 Pham TM, Zhang Y, Nevers M, *et al.* Trends in infection incidence and antimicrobial resistance in the  
532 US Veterans Affairs Healthcare System: a nationwide retrospective cohort study (2007–22). *Lancet*  
533 *Infect Dis* 2024; published online Aug 13. DOI:10.1016/S1473-3099(24)00416-X.
- 534 17 WHO bacterial priority pathogens list, 2024: Bacterial pathogens of public health importance to guide  
535 research, development and strategies to prevent and control antimicrobial resistance.  
536 <https://www.who.int/publications/i/item/9789240093461> (accessed July 9, 2024).
- 537 18 Cassini A, Högberg LD, Plachouras D, *et al.* Attributable deaths and disability-adjusted life-years caused  
538 by infections with antibiotic-resistant bacteria in the EU and the European Economic Area in 2015: a  
539 population-level modelling analysis. *Lancet Infect Dis* 2019; **19**: 56–66.
- 540 19 Modern Applied Statistics with S, 4th ed. <https://www.stats.ox.ac.uk/pub/MASS4/> (accessed July 23,  
541 2024).
- 542 20 Doan T, Worden L, Hinterwirth A, *et al.* Macrolide and Nonmacrolide Resistance with Mass  
543 Azithromycin Distribution. *N Engl J Med* 2020; **383**: 1941–50.
- 544 21 Damonti L, Gasser M, Kronenberg A, Buetti N. Epidemiology of bloodstream infections caused by  
545 extended-spectrum cephalosporin-resistant *Escherichia coli* and *Klebsiella pneumoniae* in Switzerland,  
546 2015–2022: secular trends and association with the COVID-19 pandemic. *J Hosp Infect* 2024; **150**: 145–  
547 52.
- 548 22 Kariyawasam RM, Julien DA, Jelinski DC, *et al.* Antimicrobial resistance (AMR) in COVID-19 patients: a  
549 systematic review and meta-analysis (November 2019–June 2021). *Antimicrob Resist Infect Control*  
550 2022; **11**: 45.
- 551 23 Voor in 't holt AF, Severin JA, Lesaffre EMEH, Vos MC. A Systematic Review and Meta-Analyses Show  
552 that Carbapenem Use and Medical Devices Are the Leading Risk Factors for Carbapenem-Resistant  
553 *Pseudomonas aeruginosa*. *Antimicrob Agents Chemother* 2014; **58**: 2626–37.
- 554 24 Labaste F, Grossac J, Bounes FV, *et al.* Risk factors for acquisition of carbapenem-resistance during  
555 treatment with carbapenem in the intensive care unit: a prospective study. *Eur J Clin Microbiol Infect*  
556 *Dis* 2019; **38**: 2077–85.
- 557 25 Ali Brandemeyer O, Dugravot L, Jouzeau A, *et al.* Surveillance de la consommation des antibiotiques et  
558 des résistances bactériennes en établissement de santé. Mission Spares. Résultats synthétiques, année  
559 2022. Saint-Maurice: Santé publique France, 2023.
- 560 26 Mission Spares. Bactéries multirésistantes en établissements de santé en 2018 Mission nationale

561 Spares, novembre 2019. Données 2018 du réseau BMR-Raisin. Saint-Maurice: Santé publique France,  
562 2019.

563 27 Popovich KJ, Aureden K, Ham DC, *et al.* SHEA/IDSA/APIC Practice Recommendation: Strategies to  
564 prevent methicillin-resistant *Staphylococcus aureus* transmission and infection in acute-care hospitals:  
565 2022 Update. *Infect Control Hosp Epidemiol* 2023; **44**: 1039–67.

566 28 Pichon M, Cremniter J, Burucoa C, *et al.* French national epidemiology of bacterial superinfections in  
567 ventilator-associated pneumonia in patients infected with COVID-19: the COVAP study. *Ann Clin*  
568 *Microbiol Antimicrob* 2023; **22**: 50.

569 29 Lemenand O, Thibaut S, Coëffic T, Caillon J, Birgand G. Resistance to third-generation cephalosporins,  
570 carbapenems and fluoroquinolones in *Escherichia coli* urinary isolates in primary care: trends in France  
571 2017–2021. *Bull Épidémiol Hebd* 2023; **22–23**: 458–64.

572 30 Sun DS, Kissler SM, Kanjilal S, Olesen SW, Lipsitch M, Grad YH. Analysis of multiple bacterial species and  
573 antibiotic classes reveals large variation in the association between seasonal antibiotic use and  
574 resistance. *PLOS Biol* 2022; **20**: e3001579.

575  
576  
577  
578  
579  
580  
581  
582  
583  
584  
585  
586  
587  
588  
589  
590  
591  
592  
593  
594  
595  
596  
597  
598  
599  
600  
601  
602  
603  
604  
605  
606  
607  
608

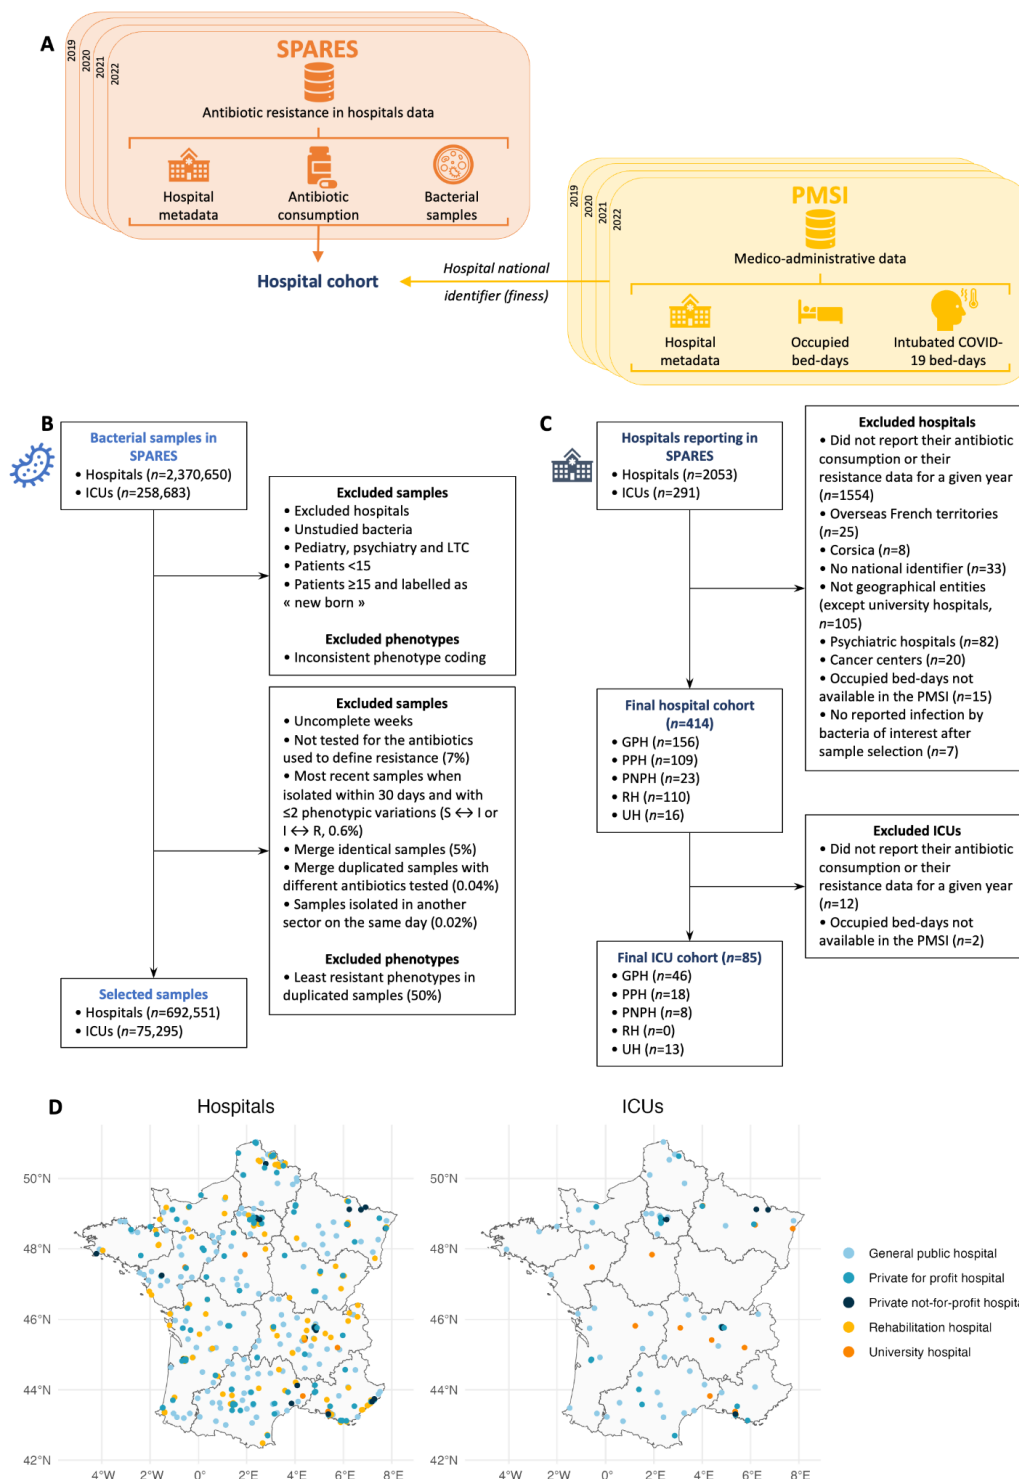

609  
610 **Figure 1. Data sources and selection.** (A) Hospitals report their antibiotic resistance data in SPARES using either  
611 their geographical identifier or their legal identifier, the latter generally grouping multiple geographical entities. We  
612 excluded all hospitals that use their legal identifier, except for teaching hospitals that often host the most severe cases.  
613 For teaching hospitals that report their data under their legal identifier, we retrieved occupied bed-days data from the  
614 PMSI using the geographical identifiers of all relevant entities (see [appendix pp 3-6](#) for more details). (B) Flow  
615 diagram of sample selection. We focused our investigations on meticillin-resistant *S. aureus*, ESBL-producing *E. coli*,  
616 *K. pneumoniae*, and *E. cloacae* complex, and carbapenem-resistant *P. aeruginosa*. *E. cloacae* complex include

617 *Enterobacter cloacae*, *Enterobacter absuriae*, *Enterobacter hormaechei*, *Enterobacter kobei*, *Enterobacter ludwigii*,  
618 and *Enterobacter nimipressuralis*. Among the duplicated samples with different phenotypes, we excluded the least  
619 resistant phenotypes, meaning phenotypes S if R or I, and phenotypes I if R (2,219/4,442, 50%). In total, we selected  
620 34% of isolates from the global database and 36% of samples isolated in intensive care units (ICUs). (C) Flow diagram  
621 of hospitals and ICUs selection. Hospitals located in French overseas territories and Corsica were removed due to  
622 specific epidemiological situations as well as low numbers that would decrease the statistical power of the regional  
623 analyses. (D) Geographical distribution of hospitals and ICUs across the 12 regions of mainland France.  
624 GPH: general public hospital; PPH: private for profit hospital; PNPH: private not-for-profit hospital; RH:  
625 rehabilitation hospital; UH: university hospital.

626  
627  
628  
629  
630  
631  
632  
633  
634  
635  
636  
637  
638  
639  
640  
641  
642  
643  
644  
645  
646  
647  
648  
649  
650  
651  
652  
653  
654  
655  
656  
657  
658  
659  
660  
661  
662  
663  
664  
665  
666

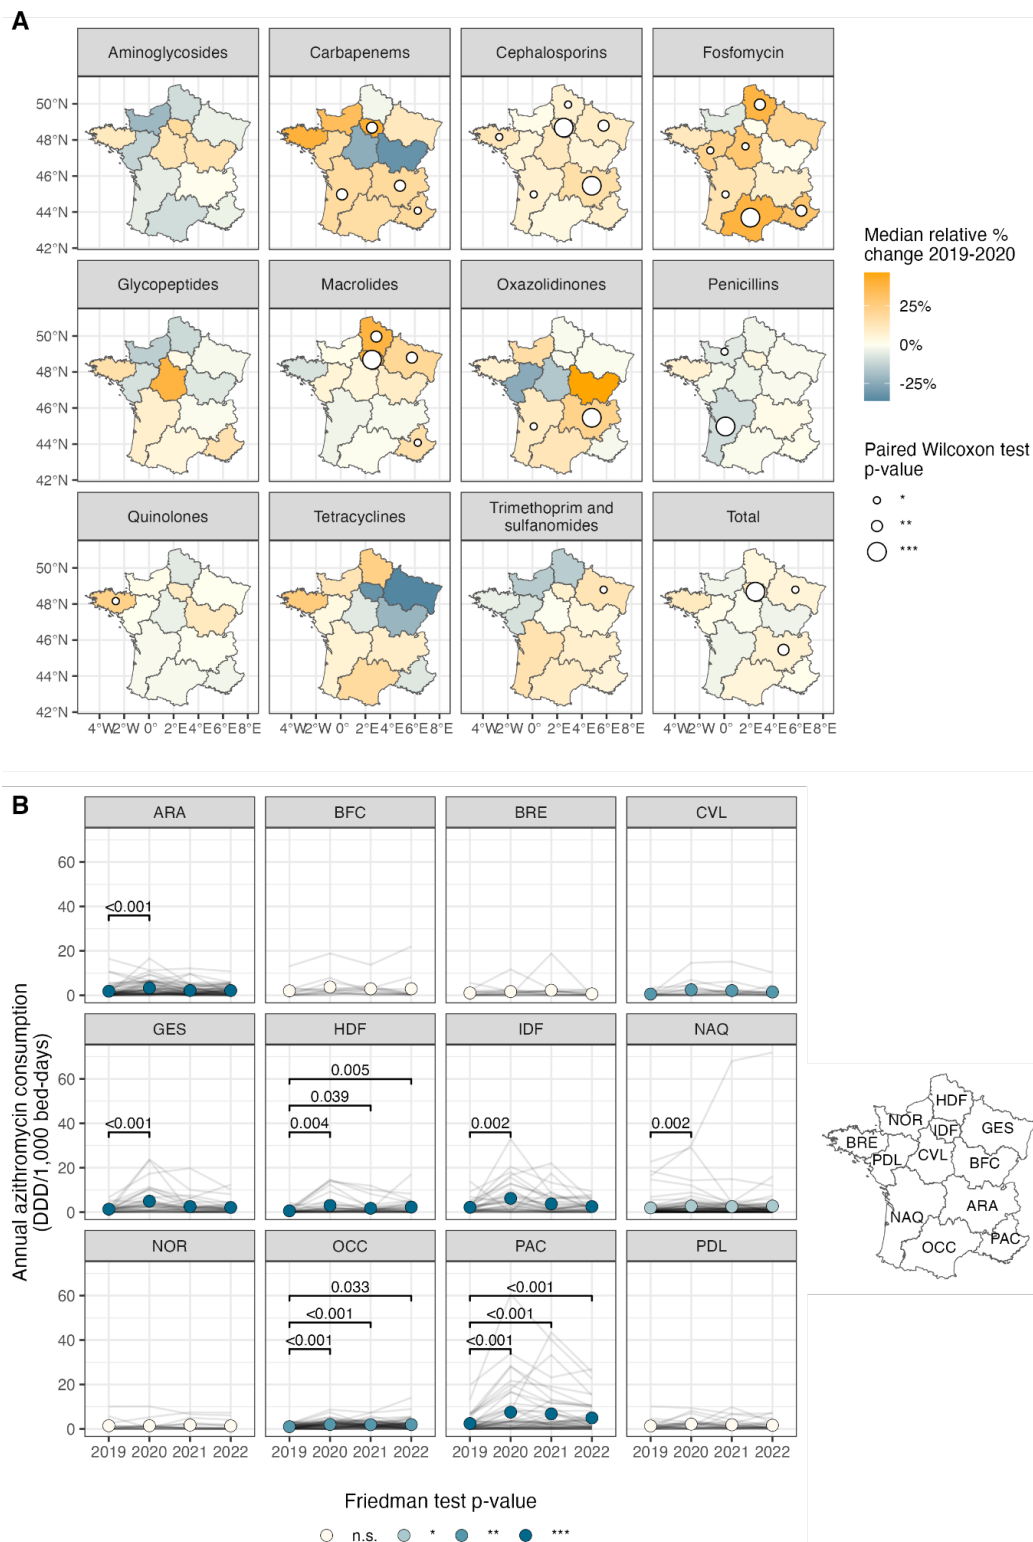

667  
668  
669  
670  
671  
672

**Figure 2. Regional heterogeneity in antibiotic consumption in French hospitals, 2019-2022.** (A) Changes of antibiotic consumption across French regions between 2019 and 2020. Colors indicate the median percentage change of antibiotic consumption between 2019 and 2020. We excluded hospitals reporting no consumption in 2019 to calculate this metric. Dark blue colors indicate increased consumption and dark orange colors indicate decreased consumption. We also performed paired Wilcoxon signed-rank tests to compare regional distributions of antibiotic



673 consumption in 2019 and 2020. Circle size indicates the level of significance of the paired Wilcoxon signed-rank tests  
674 when the p-value is  $\leq 0.05$ . **(B)** Dynamics of azithromycin consumption across French regions during the study period.  
675 Each panel represents a French region whose geographical location is shown on the right. Gray lines correspond to  
676 the trajectories of individual hospitals and colored circles to the average regional antibiotic consumption in defined  
677 daily doses (DDD) for 1,000 occupied bed-days. Colors indicate the level of significance of the Friedman test which  
678 is the non-parametric equivalent of one-way repeated measures ANOVA tests. We also indicate the corrected p-values  
679 of the paired Wilcoxon signed-rank tests between 2019 and the other years of the study period when corrected p-  
680 values are  $\leq 0.05$ . We used a Bonferroni correction.  
681 n.s. : p-value  $> 0.05$ ; \* : p-value  $\leq 0.05$ ; \*\* : p-value  $\leq 0.01$ ; \*\*\* : p-value  $\leq 0.001$ .  
682 ARA: Auvergne-Rhône-Alpes; BFC: Bourgogne-Franche-Comté; BRE: Bretagne; CVL: Centre-Val de Loire; GES:  
683 Grand-Est; HDF: Hauts-de-France; IDF: Île-de-France ; NAQ: Nouvelle-Aquitaine; NOR: Normandie; OCC:  
684 Occitanie; PAC: Provence-Alpes-Côte d'Azur; PDL: Pays de la Loire.

685  
686  
687  
688  
689  
690  
691  
692  
693  
694  
695  
696  
697  
698  
699  
700  
701  
702  
703  
704  
705  
706  
707  
708  
709  
710  
711  
712  
713  
714  
715  
716  
717  
718  
719  
720  
721  
722  
723  
724  
725  
726  
727

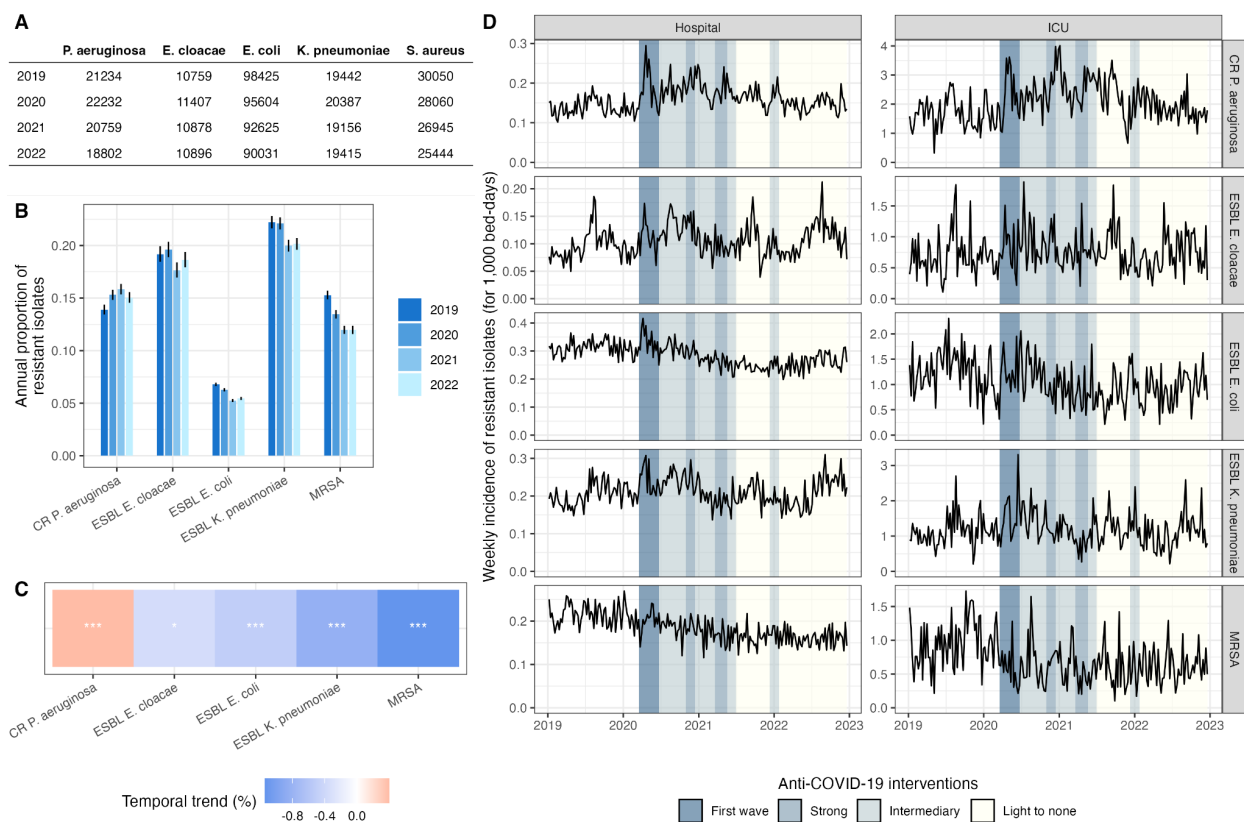

728  
729  
730  
731  
732  
733  
734  
735  
736  
737  
738  
739  
740  
741  
742  
743  
744  
745  
746  
747  
748  
749  
750  
751  
752  
753  
754  
755  
756

**Figure 3. Antibiotic resistance in hospitals in France, 2019-2022.** (A) Annual number of samples isolated in our hospital cohort ( $n=414$  hospitals) between 2019 and 2022 and stratified by bacterial species. (B) Annual proportion of resistant bacterial isolates from 2019 to 2022 in our hospital cohort. Intervals indicate the 95% Wilson CIs. (C) Temporal trend of resistance proportions between 2019 and 2022. Stars indicate the level of significance of the  $\chi^2$  trend test for proportions. (D) Weekly incidence of resistant infections for 1,000 bed-days over the study period in hospitals and intensive care units (ICUs). The strips indicate the level of anti-COVID-19 interventions in the community.<sup>2</sup>

\*:  $p\text{-value} \leq 0.05$ ; \*\*:  $p\text{-value} \leq 0.01$ ; \*\*\*:  $p\text{-value} \leq 0.001$ .

ESBL *E. cloacae*: ESBL-producing *Enterobacter cloacae* complex; ESBL *E. coli*: ESBL-producing *Escherichia coli*; ESBL *K. pneumoniae*: ESBL-producing *Klebsiella pneumoniae*; CR *P. aeruginosa*: carbapenem-resistant *Pseudomonas aeruginosa*; MRSA: methicillin-resistant *Staphylococcus aureus*.

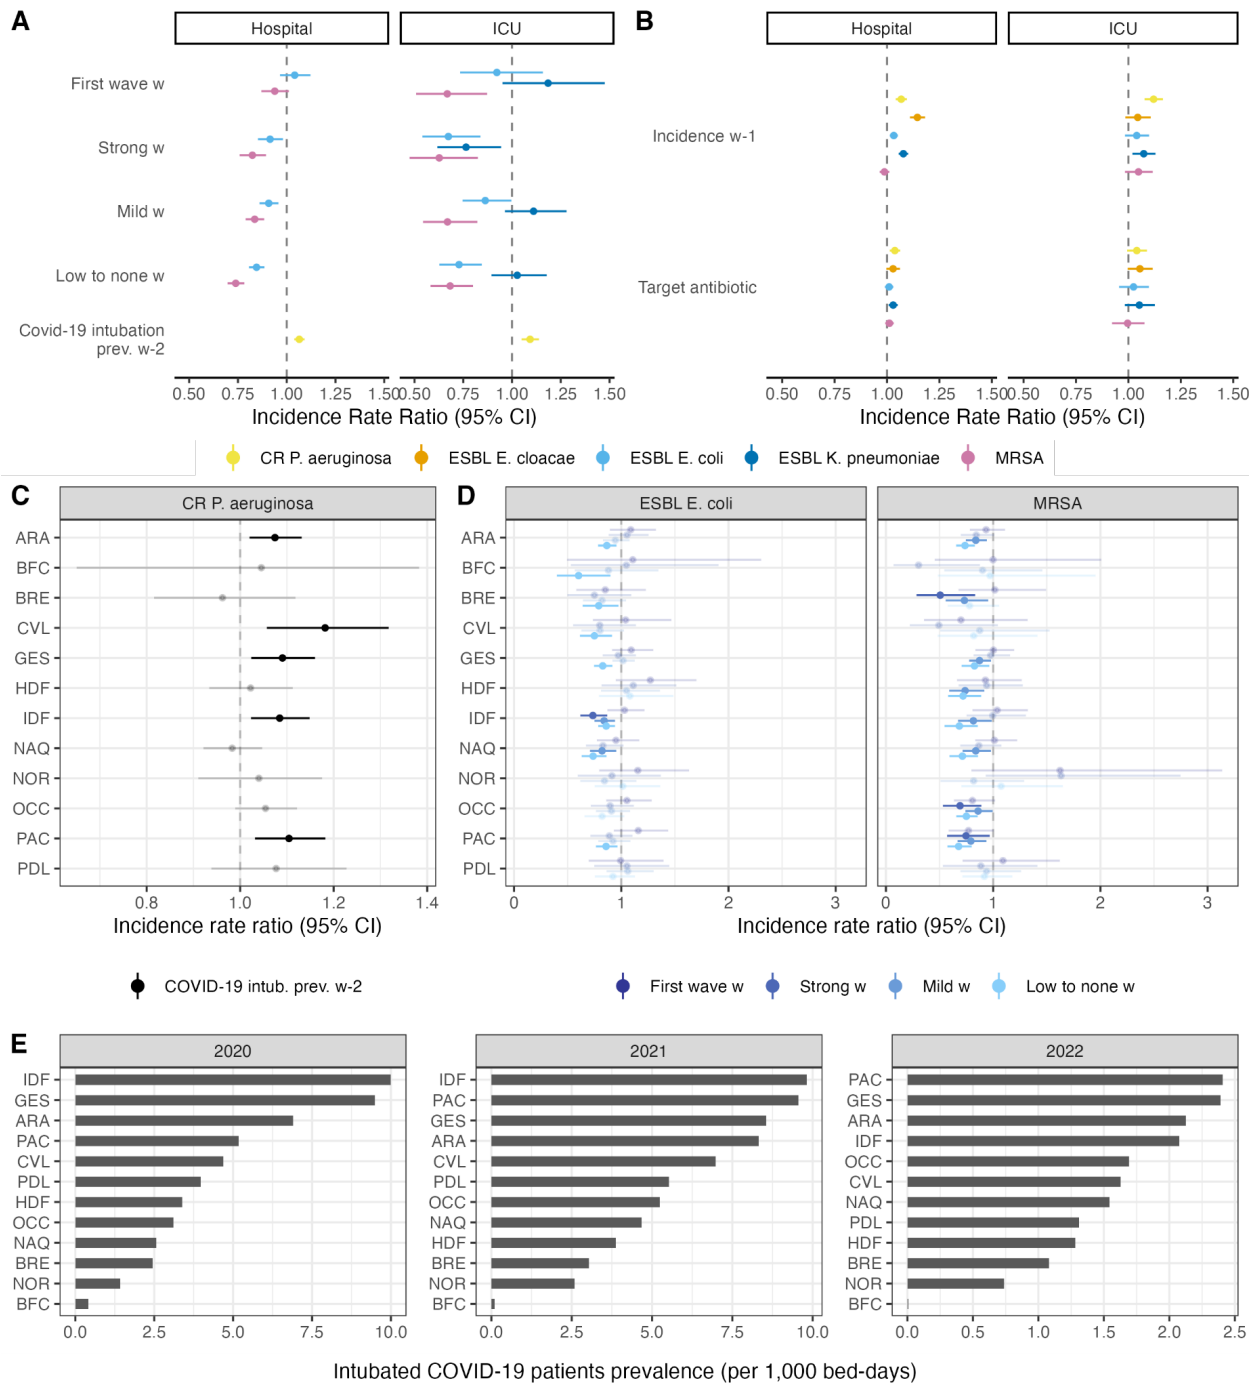

757  
758  
759  
760  
761  
762  
763  
764  
765  
766  
767  
768

**Figure 4. Results from the count regression analysis of resistant infections in French hospitals and intensive care units (ICUs).** (A) Incidence rate ratios (IRRs) of COVID-19-related variables for the best selected regression models. For ESBL-producing *E. cloacae* in ICUs and hospitals and *K. pneumoniae* in hospitals, the best models did not include COVID-19-related variables, thus they do not appear on the forest plots. For the other cases, the best models included either the COVID-19-related periods at week *w*, or the COVID-19 intubation prevalence at week *w*-2. IRR estimates for the COVID-19-related periods are relative to the pre-pandemic period. (B) IRRs of best regression models for the autocorrelation term and antibiotic consumption. Here, “target antibiotic” refers to the antibiotic class targeted by the resistance of the pathogen considered, namely broad-spectrum penicillins for ESBL-producing Enterobacteriales, imipenem+meropenem for CR-PA, and narrow spectrum penicillins for MRSA. (C) IRRs by administrative region using the best model selected at the national level on carbapenem-resistant *P. aeruginosa* (CR-PA) isolate incidence including the prevalence of COVID-19 intubated patients. (D) IRRs by administrative region

769 using the best model at the national level on ESBL-producing *E. coli* (ESBL *E. coli*) and methicillin-resistant *S. aureus*  
770 (MRSA) isolate incidence including the pandemic periods at week  $w$ . Shaded IRRs have a p-value > 0.05. Intervals  
771 correspond to the 95% CIs of the point estimates. (E) Annual prevalence of intubated COVID-19 patients for 1,000  
772 bed-days by region. Île-de-France (IDF), Grand-Est (GES), Provence-Alpes-Côte d'Azur (PAC), and Auvergne-  
773 Rhône-Alpes (ARA) were the most affected regions during the first two years of the pandemic.  
774 ESBL *E. cloacae*: ESBL-producing *Enterobacter cloacae* complex; ESBL *E. coli*: ESBL-producing *Escherichia coli*;  
775 ESBL *K. pneumoniae*: ESBL-producing *Klebsiella pneumoniae*; CR *P. aeruginosa*: carbapenem-resistant  
776 *Pseudomonas aeruginosa*; MRSA: methicillin-resistant *Staphylococcus aureus*.  
777 ARA: Auvergne-Rhône-Alpes; BFC: Bourgogne-Franche-Comté; BRE: Bretagne; CVL: Centre-Val de Loire; GES:  
778 Grand-Est; HDF: Hauts-de-France; IDF: Île-de-France ; NAQ: Nouvelle-Aquitaine; NOR: Normandie; OCC:  
779 Occitanie; PAC: Provence-Alpes-Côte d'Azur; PDL: Pays de la Loire.

780  
781  
782  
783  
784  
785  
786  
787  
788  
789  
790  
791  
792  
793  
794  
795  
796  
797  
798  
799  
800  
801  
802  
803  
804  
805  
806  
807  
808  
809  
810  
811  
812  
813  
814  
815  
816  
817

|                           | Friedman test p-value | 2019 vs 2020        |                      | 2019 vs 2021         |                      | 2019 vs 2022         |                      |
|---------------------------|-----------------------|---------------------|----------------------|----------------------|----------------------|----------------------|----------------------|
|                           |                       | Estimate (98·3% CI) | p-value <sup>1</sup> | Estimate (98·3% CI)  | p-value <sup>1</sup> | Estimate (98·3% CI)  | p-value <sup>1</sup> |
| Aminoglycosides           | <0·001                | 0<br>(-0·2, 0·2)    | 1                    | -0·3<br>(-0·6, -0·1) | 0·004                | -0·7<br>(-1·0, -0·4) | <0·001               |
| Carbapenems               | <0·001                | 0·6<br>(0·3, 0·8)   | <0·001               | 0·4<br>(0·2, 0·8)    | <0·001               | 0·2<br>(-0·1, 0·5)   | 0·288                |
|                           | Imipenem + Meropenem  | 0·5<br>(0·2, 0·7)   | <0·001               | 0·4<br>(0·2, 0·7)    | <0·001               | 0·2<br>(0, 0·5)      | 0·139                |
| Cephalosporins            | <0·001                | 3·7<br>(2·5, 5·2)   | <0·001               | 3·4<br>(2·0, 4·9)    | <0·001               | 2·6<br>(0·9, 4·4)    | <0·001               |
| Fosfomycin                | <0·001                | 0·2<br>(0·1, 0·3)   | <0·001               | 0·3<br>(0·2, 0·4)    | <0·001               | 0·4<br>(0·3, 0·5)    | <0·001               |
| Glycopeptides             | <0·001                | 0·1<br>(-0·1, 0·4)  | 0·864                | -0·3<br>(-0·6, 0)    | 0·014                | -1·0<br>(-1·4, -0·6) | <0·001               |
|                           | Vancomycin            | 0·1<br>(-0·1, 0·3)  | 0·348                | -0·2<br>(-0·4, 0)    | 0·074                | -0·8<br>(-1·1, -0·5) | <0·001               |
| Lipopeptides              | <0·001                | 1·6<br>(1·1, 2·1)   | <0·001               | 2·4<br>(1·8, 3·2)    | <0·001               | 4·3<br>(3·3, 5·5)    | <0·001               |
| Macrolides                | <0·001                | 1·7<br>(0·9, 2·6)   | <0·001               | -0·5<br>(-1·3, 0·4)  | 0·609                | -0·8<br>(-1·7, 0)    | 0·062                |
|                           | Azithromycin          | 1·3<br>(1·0, 1·7)   | <0·001               | 0·6<br>(0·4, 0·8)    | <0·001               | 0·5<br>(0·3, 0·8)    | <0·001               |
| Monobactams               | <0·001                | 0·1<br>(0, 0·2)     | <0·001               | 0·2<br>(0·1, 0·3)    | <0·001               | 0·2<br>(0·1, 0·3)    | <0·001               |
| Oxazolidinones            | <0·001                | 0·4<br>(0·2, 0·6)   | <0·001               | 0·4<br>(0·2, 0·6)    | <0·001               | 0·7<br>(0·4, 0·9)    | <0·001               |
| Penicillins               | <0·001                | -2·5<br>(-5·2, 0·2) | 0·075                | -6·4<br>(-9·3, -3·4) | <0·001               | -0·8<br>(-4·2, 2·5)  | 1                    |
| Polymyxins                | 0·002                 | 0·1<br>(0·1, 0·2)   | <0·001               | 0·2<br>(0·1, 0·3)    | <0·001               | 0<br>(0, 0·1)        | 0·816                |
| Quinolones                | <0·001                | 0·2<br>(-0·9, 1·4)  | 1                    | -1·3<br>(-2·7, 0·1)  | 0·068                | -1·6<br>(-3·0, -0·1) | 0·030                |
| Tetracyclines             | 0·002                 | 0·3<br>(-0·1, 0·7)  | 0·214                | 0·4<br>(0, 0·8)      | 0·057                | 0·5<br>(0, 0·9)      | 0·040                |
| Trimethoprim <sup>2</sup> | 0·001                 | 0·4<br>(0, 0·9)     | 0·031                | 0·4<br>(-0·1, 0·9)   | 0·146                | 0·7<br>(0·2, 1·2)    | 0·003                |
| Total                     | 0·001                 | 7·5<br>(2·7, 12·5)  | <0·001               | -0·3<br>(-5·9, 5·3)  | 1                    | 5·3<br>(-0·8, 11·4)  | 0·107                |

<sup>1</sup>Adjusted p-value with Bonferroni correction

<sup>2</sup>Corresponds to trimethoprim and combinations of sulfanomides

818  
819  
820  
821  
822

**Table 1. Changes in annual antibiotic consumption in French hospitals, 2019-2022.** We report absolute differences in consumption at the hospital level for every antibiotic class, as well as imipenem and meropenem, vancomycin, and azithromycin specifically. Estimates correspond to the median of the differences of antibiotic consumption (in DDD per 1,000 bed-days) between two years of the study period, using 2019 as a reference year.

823 Positive values thereby indicate an increased consumption compared to 2019 and negative values indicate a reduced  
824 consumption compared to 2019. For every pairwise comparison, we report the adjusted p-value of the paired Wilcoxon  
825 signed-rank test using a Bonferroni correction and the associated 98.3% CI. Finally, we report Friedman tests p-values  
826 that are the non-parametric equivalent of one-way repeated measures ANOVA tests to evaluate whether there are  
827 changes in antibiotic use over the study period.

828  
829  
830  
831  
832  
833  
834  
835  
836  
837  
838  
839  
840  
841  
842  
843  
844  
845  
846  
847  
848  
849  
850  
851  
852  
853  
854  
855  
856  
857  
858  
859  
860  
861  
862  
863  
864  
865  
866  
867  
868  
869  
870

|                           | Friedman test p-value | 2019 vs 2020                          |                      | 2019 vs 2021                          |                      | 2019 vs 2022                         |                      |
|---------------------------|-----------------------|---------------------------------------|----------------------|---------------------------------------|----------------------|--------------------------------------|----------------------|
|                           |                       | Estimate (98.3% CI)                   | p-value <sup>1</sup> | Estimate (98.3% CI)                   | p-value <sup>1</sup> | Estimate (98.3% CI)                  | p-value <sup>1</sup> |
| Aminoglycosides           | 0.001                 | -4.0<br>(-11.1, 3.4)                  | 0.639                | -5.4<br>(-15.2, 5.1)                  | 0.636                | <b>-11.3</b><br><b>(-19.3, -3.0)</b> | 0.004                |
| Carbapenems               | <0.001                | <b>12.2</b><br><b>(4.1, 19.4)</b>     | 0.001                | <b>14.4</b><br><b>(4.5, 23.8)</b>     | 0.004                | 10.1<br>(-0.9, 20.1)                 | 0.078                |
|                           | Imipenem + Meropenem  | <b>12.5</b><br><b>(4.7, 19.8)</b>     | <0.001               | <b>15.8</b><br><b>(6.7, 25.1)</b>     | <0.001               | <b>12.5</b><br><b>(1.9, 22.4)</b>    | 0.018                |
| Cephalosporins            | 0.011                 | <b>24.5</b><br><b>(8.2, 38.9)</b>     | <0.001               | <b>19.4</b><br><b>(0.5, 37.6)</b>     | 0.042                | <b>25.5</b><br><b>(6.8, 44.4)</b>    | 0.003                |
| Fosfomycin                | 0.351                 | 0<br>(-0.6, 0.5)                      | 1                    | 0<br>(-0.6, 0.4)                      | 1                    | -0.3<br>(-0.9, 0.1)                  | 0.223                |
| Glycopeptides             | 0.002                 | 1.1<br>(-4, 5.3)                      | 1                    | -5<br>(-10.6, 0.9)                    | 0.13                 | -4.7<br>(-10.8, 0.7)                 | 0.106                |
|                           | Vancomycin            | 0.7<br>(-3.9, 5.1)                    | 1                    | -4.3<br>(-9.9, 1.1)                   | 0.166                | -4.6<br>(-10.7, 0.8)                 | 0.115                |
| Lipopeptides              | <0.001                | <b>8.8</b><br><b>(2.4, 15.1)</b>      | 0.004                | <b>7.1</b><br><b>(0.4, 14.1)</b>      | 0.033                | <b>16.9</b><br><b>(10.2, 24.2)</b>   | <0.001               |
| Macrolides                | <0.001                | <b>17.4</b><br><b>(7.7, 28.9)</b>     | <0.001               | -4.2<br>(-14.0, 6.5)                  | 0.942                | -5.6<br>(-14.8, 3.9)                 | 0.447                |
|                           | Azithromycin          | <b>12.7</b><br><b>(5.8, 20.5)</b>     | <0.001               | 0.8<br>(-0.5, 2.7)                    | 0.459                | 1.1<br>(-0.3, 2.7)                   | 0.146                |
| Monobactams               | 0.008                 | <b>1.0</b><br><b>(0, 2.3)</b>         | 0.04                 | 1.3<br>(0, 3.0)                       | 0.059                | <b>1.3</b><br><b>(0.4, 2.2)</b>      | 0.003                |
| Oxazolidinones            | 0.048                 | 2.3<br>(-2.3, 7.3)                    | 0.654                | 0.5<br>(-4.6, 6.2)                    | 1                    | 4.1<br>(-1.1, 8.7)                   | 0.163                |
| Penicillins               | <0.001                | <b>-51.2</b><br><b>(-78.0, -27.1)</b> | <0.001               | <b>-69.1</b><br><b>(-98.1, -39.9)</b> | <0.001               | -10.1<br>(-40.6, 19.6)               | 1                    |
| Polymyxins                | 0.009                 | <b>1.3</b><br><b>(0, 2.7)</b>         | 0.043                | <b>2.3</b><br><b>(0.7, 4.7)</b>       | 0.003                | 0.3<br>(-0.6, 1.6)                   | 1                    |
| Quinolones                | 0.003                 | <b>-14.9</b><br><b>(-24.4, -5.7)</b>  | <0.001               | <b>-12.7</b><br><b>(-24.4, -1.6)</b>  | 0.024                | <b>-14.3</b><br><b>(-26.5, -3.5)</b> | 0.007                |
| Tetracyclines             | 0.619                 | -0.1<br>(-2.4, 1.9)                   | 1                    | -0.1<br>(-2.8, 2.4)                   | 1                    | 0.9<br>(-1.5, 3.6)                   | 0.987                |
| Trimethoprim <sup>2</sup> | 0.065                 | -1.7<br>(-6.4, 3.1)                   | 1                    | 0.1<br>(-5.7, 5.6)                    | 1                    | <b>5.9</b><br><b>(0.9, 11.9)</b>     | 0.017                |
| Total                     | 0.058                 | 4.1<br>(-40.9, 49.4)                  | 1                    | -41.0<br>(-105.5, 24.3)               | 0.456                | 24.1<br>(-29.7, 80.9)                | 0.780                |

<sup>1</sup>Adjusted p-value with Bonferroni correction

<sup>2</sup>Corresponds to trimethoprim and combinations of sulfanamides

871  
872 **Table 2. Changes in annual antibiotic consumption in French ICUs, 2019-2022.** We report absolute differences  
873 in consumption at the ICU level for every antibiotic class, as well as imipenem and meropenem, vancomycin, and  
874 azithromycin specifically. Estimates correspond to the median of the differences of antibiotic consumption (in DDD  
875 per 1,000 bed-days) between two years of the study period, using 2019 as a reference year. Positive values thereby

876 indicate an increased consumption compared to 2019 and negative values indicate a reduced consumption compared  
877 to 2019. For every pairwise comparison, we report the adjusted p-value of the paired Wilcoxon signed-rank test using  
878 a Bonferroni correction and the associated 98·3% CI. Finally, we report Friedman tests p-values that are the non-  
879 parametric equivalent of one-way repeated measures ANOVA tests to evaluate whether there are changes in antibiotic  
880 use over the study period.  
881
